# Supplementary material
Source: publisher figshare collection journal article supplement (https://sage.figshare.com/ndownloader/files/18615824)
Supplement: Supplementary file 1 [file 18615824]

## Running Head: MAJOR MENTAL ILLNESS AND SEX OFFENDING

Exploring the Relationship Between Major Mental Illness and Sex Offending Behavior in a High-Risk

Population:

Supplemental Material

### *Offense Pathways Coding Form*

| Item                                                                                                                                                | Coding Rules                                                                                                                                                                                                                                                                                                                                                                                         |
|-----------------------------------------------------------------------------------------------------------------------------------------------------|------------------------------------------------------------------------------------------------------------------------------------------------------------------------------------------------------------------------------------------------------------------------------------------------------------------------------------------------------------------------------------------------------|
| Relationship with victim of sex offense #1<br>(if 2 or more victims, code the <i>LOWEST</i> number; base on duration and closeness of relationship) | 5 - Very close relationship (e.g., immediate family member, romantic partner)<br>4 - Close relationship (e.g., friend, relative, dating partner, etc.)<br>3 - Specific relationship (e.g., teacher, babysitter, etc.) or between friends<br>2 - Acquaintance (i.e., a stranger known > 24 hours)<br>1 - Stranger (i.e., someone known < 24 hours)<br>0 - Not Applicable (i.e., no identified victim) |
| Sex offense #1 victim type<br>(if 2 or more victims, code the <i>HIGHEST</i> )                                                                      | 5 - Prepubescent male aged 0 - 10<br>4 - Prepubescent female aged 0 - 10<br>3 - Pubescent male aged 11 - 17<br>2 - Pubescent female aged 11 - 17<br>1 - Adult male or females<br>0 - Not Applicable                                                                                                                                                                                                  |
| Psychosis at or near time of sex offense #1<br>(within or preceding 72 hours of offense)                                                            | 4 - Substantial psychotic symptoms (e.g., bizarre or pervasive delusions, hallucinations)<br>3 - Moderate psychotic symptoms (e.g., intermittent voices or delusions, hallucinations)<br>2 - Non-psychotic disturbance (e.g., depersonalized)<br>1 - Non-psychotic<br>0 - Not Applicable (i.e., no psychotic illness)                                                                                |
| Manic symptoms at or near time of sex offense #1<br>(within or preceding 72 hours of offense)                                                       | 4 - Substantial symptoms of mania (i.e., usually includes psychosis and grandiosity)<br>3 - Moderate manic symptoms (e.g., pressured speech; flight of ideas; grandiosity)<br>2 - Minor symptoms of mania (e.g., early symptoms of hypomania evident)<br>1 - Not manic or hypomanic<br>0 - Not Applicable (i.e., no manic illness)                                                                   |
| Compliance with psychotropic medication at or near time of sex offense #1                                                                           | 3 - Non-compliant for $\geq 30$ days prior to offense<br>2 - Non-compliant for < 30 days OR only partially / intermittently compliant                                                                                                                                                                                                                                                                |

|                                                                                |                                                                                                                                                                                                                                                                                                                                                                                                                                                                                                                                                                                                                                                                                                                                                                                                                                                                                                                                                                                                                                                                                                                                                                                                                                                                                                                                                                                                                                                                                                                             |
|--------------------------------------------------------------------------------|-----------------------------------------------------------------------------------------------------------------------------------------------------------------------------------------------------------------------------------------------------------------------------------------------------------------------------------------------------------------------------------------------------------------------------------------------------------------------------------------------------------------------------------------------------------------------------------------------------------------------------------------------------------------------------------------------------------------------------------------------------------------------------------------------------------------------------------------------------------------------------------------------------------------------------------------------------------------------------------------------------------------------------------------------------------------------------------------------------------------------------------------------------------------------------------------------------------------------------------------------------------------------------------------------------------------------------------------------------------------------------------------------------------------------------------------------------------------------------------------------------------------------------|
|                                                                                | <p>1 - Compliant with medication at time of offense</p> <p>0 - Not Applicable (<i>i.e., not prescribed meds</i>)</p>                                                                                                                                                                                                                                                                                                                                                                                                                                                                                                                                                                                                                                                                                                                                                                                                                                                                                                                                                                                                                                                                                                                                                                                                                                                                                                                                                                                                        |
| Effect of psychiatric symptom(s) on sex offense #1                             | <p>4 - Direct Effect: The delusion/hallucination/symptom contained a sexual theme clearly congruent with carrying out the index offense (<i>e.g., the sex attacker believed that he was carrying out a mission to avert world catastrophe; an imperative auditory hallucination instructed him to rape or carry out a sex attack</i>)</p> <p>3 - Indirect Effect: The delusion/hallucination/symptom contained a sexual theme that was not directly congruent, but not entirely unrelated with the sex assault (<i>e.g., he was famous and admired by all women or was developing another person's interest in sexual matters; a command hallucination that instructed him to carry out a mission, but not specifically sexual; a tactile hallucination perceived as sexual by the victim, e.g., the sensation of being touched in the genital region</i>) OR had no sexual content but was linked in some way to the offense (<i>e.g., persecutory belief regarding the victim's intent to retaliate with a retaliatory physical assault</i>). In the latter, the type of delusional content must account for the sexual nature of the offense.</p> <p>2 - Coincidental Effect: The delusion/hallucination/symptom appeared to be unrelated to carrying out the sex offense (<i>e.g., a belief that he was being monitored by the police, command hallucinations to pray 10 hours a day</i>)</p> <p>1 - No symptoms present at the time of offense</p> <p>0 - Not Applicable (<i>i.e., not yet diagnosed with MMI</i>)</p> |
| Motivation for sex offense #1<br>(code the <b>HIGHEST</b> number that applies) | <p>4 - Directly related to psychosis or mania (<i>e.g., command hallucinations, delusions</i>)</p> <p>3 - Normative and intact sexual drive maladaptively expressed through conduct disorder and poor social skills (<i>e.g., intellectually disabled man kisses and grabs the pants of a dementing grandfather makes sexual contact with adult grandson/granddaughter</i>)</p> <p>2 - Evidence of a deviant arousal pattern (<i>e.g., history of deviant interests in sexual acts [rape/pedophilia/humiliation/snuff/bondage] similar to the sex offense</i>)</p> <p>1 - Part of an antisocial personality style / general criminal lifestyle (<i>e.g., history of sexual assault, history of rapes, history of offenses towards children, history of offenses while intoxicated</i>)</p>                                                                                                                                                                                                                                                                                                                                                                                                                                                                                                                                                                                                                                                                                                                                  |
| Alcohol use at or near time of sex offense #1                                  | <p>4 - Substantial use (<i>e.g., severe intoxication, large quantities of alcohol consumed, significantly impaired, difficulty with speech and ambulation</i>)</p> <p>3 - Moderate use (<i>e.g., several drinks; drunk but still able to ambulate</i>)</p> <p>2 - Minimal use (<i>e.g., 1 or 2 drinks, 1 joint, buzzed, but not enough to be intoxicated</i>)</p> <p>1 - No alcohol use at or near time of offense</p>                                                                                                                                                                                                                                                                                                                                                                                                                                                                                                                                                                                                                                                                                                                                                                                                                                                                                                                                                                                                                                                                                                      |
| Substance use at or near time of sex offense #1                                | <p>4 - Substantial use (<i>e.g., intoxicated; difficulty with speech and ambulation</i>)</p> <p>3 - Moderate use (<i>e.g., stoned or intoxicated but still able to ambulate</i>)</p> <p>2 - Minimal use (<i>e.g., buzzed, but not enough to be intoxicated</i>)</p> <p>1 - No substance use at or near time of offense</p>                                                                                                                                                                                                                                                                                                                                                                                                                                                                                                                                                                                                                                                                                                                                                                                                                                                                                                                                                                                                                                                                                                                                                                                                  |
| Planning involved in sex offense #1                                            | <p>4 - Extensive planning (<i>e.g., detailed plan or preparation, rehearsal</i>)</p> <p>3 - Moderate planning (<i>e.g., contemplation of action for more than 24 hours</i>)</p> <p>2 - Some planning (<i>e.g., action within 24 hours, some plan or preparation, but not the steps that were not developed in the heat of the moment, man leaves the house and returns with a gun later in the day</i>)</p> <p>1 - Very little or no planning (<i>e.g., acts during argument or fight, no premeditation</i>)</p>                                                                                                                                                                                                                                                                                                                                                                                                                                                                                                                                                                                                                                                                                                                                                                                                                                                                                                                                                                                                            |

|                                                                                                                                                                                                                                                                                                |                                                                                                                                                                                                                                                                                                                                                                                                                                                                                                                                                                                                                                                                                                                                                                                                                                                                                                                                                                                                                                                                                                                                                                                                                                                                                 |
|------------------------------------------------------------------------------------------------------------------------------------------------------------------------------------------------------------------------------------------------------------------------------------------------|---------------------------------------------------------------------------------------------------------------------------------------------------------------------------------------------------------------------------------------------------------------------------------------------------------------------------------------------------------------------------------------------------------------------------------------------------------------------------------------------------------------------------------------------------------------------------------------------------------------------------------------------------------------------------------------------------------------------------------------------------------------------------------------------------------------------------------------------------------------------------------------------------------------------------------------------------------------------------------------------------------------------------------------------------------------------------------------------------------------------------------------------------------------------------------------------------------------------------------------------------------------------------------|
|                                                                                                                                                                                                                                                                                                | <i>plan that may have had steps but was developed in the heat of the moment during argument to load a gun)</i>                                                                                                                                                                                                                                                                                                                                                                                                                                                                                                                                                                                                                                                                                                                                                                                                                                                                                                                                                                                                                                                                                                                                                                  |
| Emotional state during sex offense #1<br>(How much emotional arousal, especially anger, did the subject experience at the time of the sex offense? Just code the perpetrator's mental state, not attitude towards the victim. Primarily code anger, but also consider other affects like fear) | <p>4 - Enraged, furious, described as "out of control," irrational, or panicked (extraordinary level of emotional arousal that is of short duration)</p> <p>3 - Angry, mad, extremely frightened (can be a protracted state)</p> <p>2 - Excited, nervous, anxious, scared</p> <p>1 - Calm or slightly tense at most</p>                                                                                                                                                                                                                                                                                                                                                                                                                                                                                                                                                                                                                                                                                                                                                                                                                                                                                                                                                         |
| Severity of <u>physical</u> injury suffered by victim of sex offense #1<br>(consider actual harm to victim, not subject's intention; do not count sexual assault as assault for this item)                                                                                                     | <p>7 - Extreme homicide (e.g., multiple victims or multiple fatalities, mutilation after homicide)</p> <p>6 - Homicide</p> <p>5 - Severe injury (e.g., lasting impairment or life-threatening injury)</p> <p>4 - Serious injury requiring substantial hospital treatment (e.g. broken limb, wound, lacerations from rape)</p> <p>3 - Minor injury (e.g., visible bruising, minor lacerations, minor medical treatment from attempted rape)</p> <p>2 - Assault without visible injury (e.g., restrained against will, shoved to the ground, slapped, spit on)</p> <p>1 - No physical injury (e.g., threatened with weapon, threatened by harm to someone/something else, called names, intimidated/stalked)</p> <p>0 - Not Applicable (e.g., no identified victim; non-contact offense)</p>                                                                                                                                                                                                                                                                                                                                                                                                                                                                                      |
| Instrumental Physical Aggression vs. Reactive/Hostile Physical Aggression during sex offense #1                                                                                                                                                                                                | <p>4 - Clearly instrumental aggression: The physical aggression involved in clearly goal-directed and involved planning. (e.g., striking or restraining for compliance; sadistic aggression during sex; pistol-whipping a boyfriend and then raping his girlfriend in front of him). May involve little planning or be directed (e.g., shooting someone who walks in on a rape). The aggression is goal-directed, not emotions. Instrumental aggressors may be nervous or aroused but it is not the arousal that <u>initiates</u> the crime (e.g., a sadist cuts the face to heighten his arousal during the sex offense, but this arousal did not lead to the crime).</p> <p>3 - Primarily instrumental, some reactive qualities</p> <p>2 - Primarily reactive hostile aggression, some instrumental qualities</p> <p>1 - Clearly reactive hostile aggression: The physical aggression was a result of interpersonal conflict and arousal of hostility. The objective is to harm the victim, typically in response to interpersonal conflict (e.g., a rape victim bites the perpetrator during the offense; she responds by punching her face; a couple has an argument and the perpetrator then becomes aroused by the violence and rapes her).</p> <p>0 - Not Applicable</p> |

*Note.* An additional variable documenting the subject's age at the time of the offense was also coded. Some items adapted from Cornell (1996) and Smith and Taylor (1999).
